# Supplementary material for: Diagnostic Performance of Host and Viral DNA Methylation Analysis in the Identification of Anal Intraepithelial Neoplasia and Cancer: Systematic Review and Meta-Analysis
Source: MDPI journal article supplement (doi:10.3390/healthcare12191951), 2024-09-30
Supplement: s1 [file s1]

Figure S1\_Supplementary: Bias and applicability evaluation of included studies with Quality Assessment of Diagnostic Accuracy Studies (QUADAS-2) tool.\*

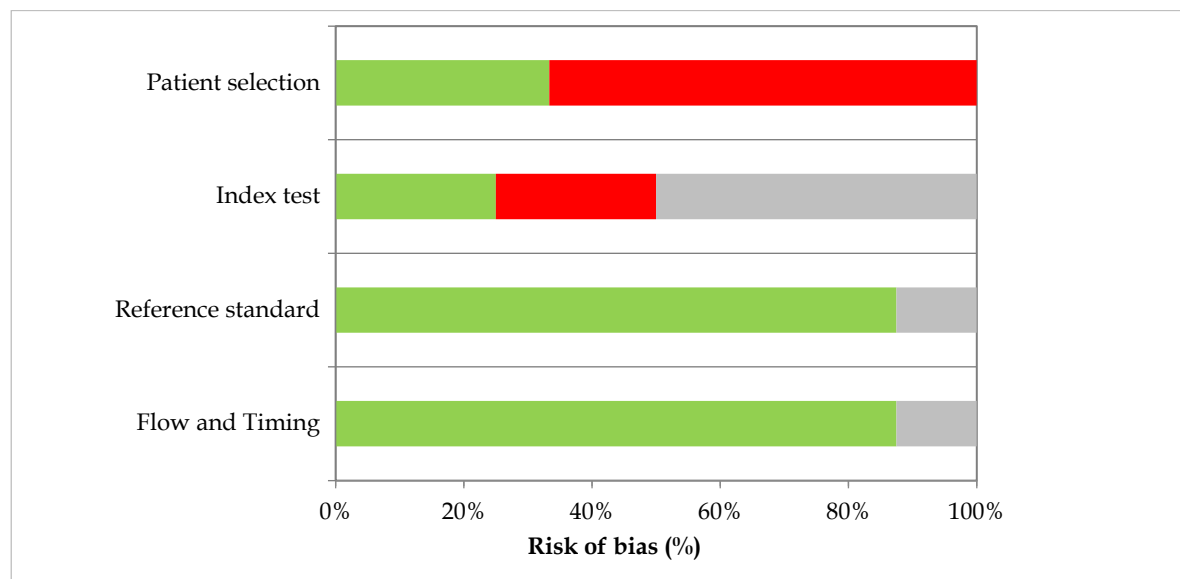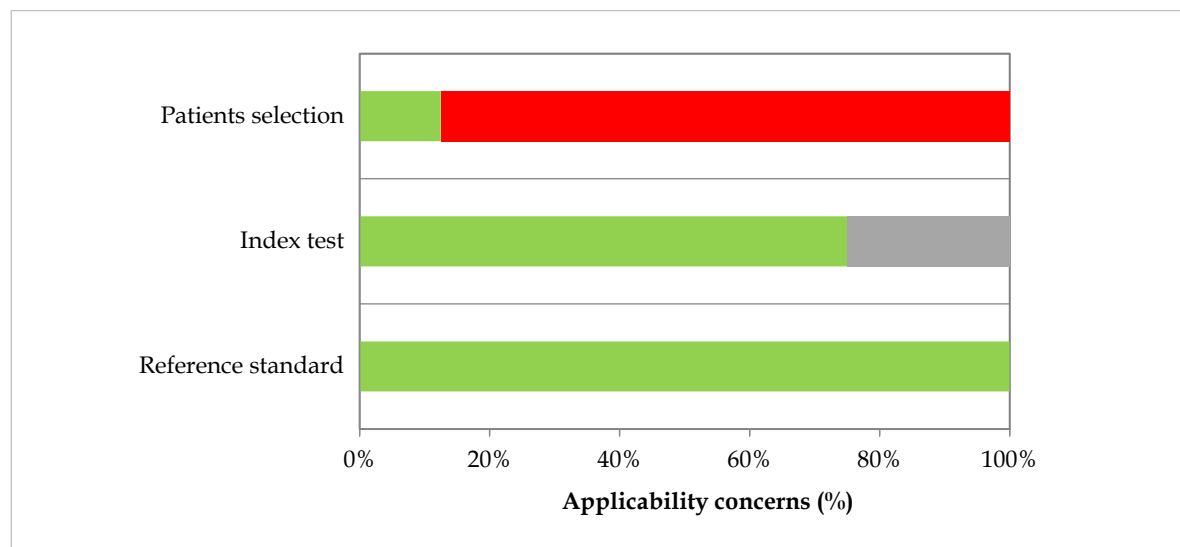

\* Green: Low risk; Grey: Unclear risk; Red: High risk

Table S1\_Supplementary. Characteristics of the study and demographic data.

| n | First Author                  | Year | Study design                   | Mono /Multicentre | Country/ies | Samples collection (Y) | Sample size | Samples analysed | Age, mean/median (SD/IQR)* | Female, n (%) | Male, n (%) |
|---|-------------------------------|------|--------------------------------|-------------------|-------------|------------------------|-------------|------------------|----------------------------|---------------|-------------|
| 1 | <i>Chaiwongkot A; 2021</i>    | 2021 | Observational-retrospective    | Monocentre        | Thailand    | 2013                   | 178         | 178              | 31.2                       |               |             |
|   | <i>Lahiri CD; 2020</i>        | 2020 | Cross-sectional                | Monocentre        | Atlanta     |                        | 75          | 75               | 48.7 (8.5)                 | 75 (100)      |             |
| 3 | <i>Phillips S; 2022</i>       | 2022 | Observational                  | Monocentre        | Australia   |                        | 429         | 429              | 49 (35-75)                 |               | 429 (100)   |
| 4 | <i>Rozemeijer K; 2023</i>     | 2023 | Cross-sectional                | Multicentre       | Netherlands | 2018-2020              | 111         | 111              | 54.9 (10.4)                | 1 (0.1)       | 110 (99.1)  |
| 5 | <i>van der Zee RP; 2019_a</i> | 2019 | Observational                  | Monocentre        | Netherlands | 1986-2011              | 122         | 122              | 48                         |               | 148 (100)   |
| 6 | <i>van der Zee RP; 2021_c</i> | 2019 | Cross-sectional + longitudinal | Monocentre        | Netherlands | 1999-2018              | 345         | 345              | 48 (47-53)                 |               | 345 (100)   |
| 7 | <i>van der Zee RP; 2021_a</i> | 2021 | Observational                  | Monocentre        | Netherlands | 1985-2020              | 121         | 176              | 52 (41-62)                 | 57 (47.1)     | 64 (52.9)   |
| 8 | <i>van der Zee RP; 2021_b</i> | 2021 | Observational                  | Monocentre        | Netherlands | 1999-2016              | 93          | 104              |                            |               | 93 (100)    |

\*SD/IQR: Standard Deviation/Interquartile range

Table S2\_Supplementary. HPV positivity, histological classification of samples included in the systematic review.

| n | First Author                  | Type of samples | HPV+, n (%) | Histological results, Tot. (n) | Normal Histology, n (%) | AIN 1, n (%) | AIN 2, n (%) | AIN 3, n (%) | SCC, n (%) | Low Grade AIN, n (%) | High Grade AIN, n (%) |
|---|-------------------------------|-----------------|-------------|--------------------------------|-------------------------|--------------|--------------|--------------|------------|----------------------|-----------------------|
| 1 | <i>Chaiwongkot A; 2021</i>    | Anal tissue     | 178 (100.0) | 123                            | 16 (13.0)               | 67 (54.5)    | 12 (9.8)     | 28 (22.8)    |            |                      |                       |
| 2 | <i>Lahiri CD; 2020</i>        | Anal tissue     | 57 (77.0)   | 53                             | 17 (32.1)               |              |              |              |            | 23 (43.4)            | 13 (24.5)             |
| 3 | <i>Phillips S; 2022</i>       | Anal tissue     | 315 (73.4)  | 429                            | 286 (66.7)              |              |              |              |            | 26 (6.1)             | 117 (27.3)            |
| 4 | <i>Rozemeijer K; 2023</i>     | Anal tissue     | 68 (61.8)   | 111                            | 23 (20.7)               | 17 (15.3)    | 25 (22.5)    | 31 (27.9)    | 15 (13.5)  |                      |                       |
| 5 | <i>van der Zee RP; 2019_a</i> | Anal tissue     | 139 (93.9)  | 148                            | 34 (23.0)               | 22 (14.9)    | 42 (28.4)    | 24 (16.2)    | 26 (17.6)  |                      |                       |
| 6 | <i>van der Zee RP; 2021_c</i> | Anal tissue     | 305 (88.4)  | 345                            | 106 (30.7)              | 37 (10.7)    | 98 (28.4)    | 74 (21.4)    | 30 (8.7)   |                      |                       |
| 7 | <i>van der Zee RP; 2021_a</i> | Anal tissue     | 148 (84.1)  | 176                            | 30 (17.0)               | 57 (32.4)    | 21 (11.9)    | 28 (15.9)    | 40 (22.7)  |                      |                       |
| 8 | <i>van der Zee RP; 2021_b</i> | Anal tissue     | 39 (37.5)   | 104                            | 8 (7.7)                 | 26 (25.0)    | 45 (43.3)    | 15 (14.4)    | 10 (9.6)   |                      |                       |

AIN: Anal Intraepithelial Neoplasia

Table S3\_Supplementary. Target genes of DNA methylation test in the included studies.

| <b>n</b> | <b>First Author</b>    | <b>Methylation test</b>               | <b>Target genome methylation test</b> | <b>Target genes included</b>                                                                               |
|----------|------------------------|---------------------------------------|---------------------------------------|------------------------------------------------------------------------------------------------------------|
| 1        | Chaiwongkot A; 2021    | Pyrosequencing                        | Viral                                 | HPV-16 early promoter (CpG 31,37,43,52, and 58);<br>L1 region (CpG 7136, 7145, 5600, 5606, 5609, and 5615) |
| 2        | Lahiri CD; 2020        | Quantitative methylation-specific PCR | Host                                  | FAM19A4, miR124-2                                                                                          |
| 3        | Phillips S; 2022 §     | Quantitative methylation-specific PCR | Host                                  | CADM1, MAL, miR124-2                                                                                       |
| 4        | Rozemeijer K; 2023     | Quantitative methylation-specific PCR | Host                                  | ASCL1, ZNF582, SST                                                                                         |
| 5        | van der Zee RP; 2019_a | Quantitative methylation-specific PCR | Host                                  | ASCL1, GHSR, SST, ST6GALNAC3, ST6GALNAC5, WDR17, ZIC1, ZNF582, ZNF583                                      |
| 6        | van der Zee RP; 2021_c | Quantitative methylation-specific PCR | Host                                  | ASCL1, SST, ZNF582                                                                                         |
| 7        | van der Zee RP; 2021_a | Quantitative methylation-specific PCR | Host                                  | ASCL1, ST6GALNAC3, WDR17, ZIC1, ZNF582                                                                     |
| 8        | van der Zee RP; 2021_b | Quantitative methylation-specific PCR | Host                                  | ASCL1, LHX8, ZNF582, SST, WDR17, ZIC1                                                                      |

§ LSIL+Normal=Neg

Table S4\_Supplementary: Results of DNA methylation by single target gene.

| Study ID.                 | Hystologic<br>al<br>classificati<br>on | ASCL<br>1 | LHX8 | SST | WDR17 | ZIC1 | ZNF582          | miR124-2          | MAL               | CADM1            | L1 gene (CpG<br>5600) | L1 gene (CpG<br>5609) |
|---------------------------|----------------------------------------|-----------|------|-----|-------|------|-----------------|-------------------|-------------------|------------------|-----------------------|-----------------------|
| Chaiwongkot A; 2021       | Normal                                 |           |      |     |       |      |                 |                   |                   |                  | 0/16 (0.0)            | 0/16 (0.0)            |
|                           | AIN1                                   |           |      |     |       |      |                 |                   |                   |                  | 6/67 (10.5)           | 2/67 (3.0)            |
|                           | AIN2                                   |           |      |     |       |      |                 |                   |                   |                  | 3/12 (25.0)           | 2/12 (16.7)           |
|                           | AIN3                                   |           |      |     |       |      |                 |                   |                   |                  | 8/28 (28.6)           | 2/28 (7.1)            |
| Lahiri CD; 2020 *         | HSIL                                   |           |      |     |       |      |                 | 11/13 (84.6)      |                   |                  |                       |                       |
|                           | LSIL                                   |           |      |     |       |      |                 | 23/40 (57.5)      |                   |                  |                       |                       |
| Phillips S; 2022          | HSIL                                   |           |      |     |       |      |                 | 68/117<br>(58.1)  | 76/117<br>(65.0)  | 54/117<br>(46.2) |                       |                       |
|                           | LSIL                                   |           |      |     |       |      |                 | 143/312<br>(45.8) | 147/312<br>(41.1) | 73/312<br>(23.4) |                       |                       |
| Rozemeijer K; 2023 **     | Normal                                 |           |      |     |       |      | 8/23 (34.8)     |                   |                   |                  |                       |                       |
|                           | AIN1                                   |           |      |     |       |      | 4/17 (23.5)     |                   |                   |                  |                       |                       |
|                           | AIN2                                   |           |      |     |       |      | 10/25 (40)      |                   |                   |                  |                       |                       |
|                           | AIN3                                   |           |      |     |       |      | 20/31<br>(64.5) |                   |                   |                  |                       |                       |
|                           | SCC                                    |           |      |     |       |      | 14/15<br>(93.3) |                   |                   |                  |                       |                       |
| van der Zee RP;<br>2019_a | AIN1                                   |           |      |     |       |      | 13/22<br>(13.6) |                   |                   |                  |                       |                       |
|                           | AIN2                                   |           |      |     |       |      | 18/42<br>(42.9) |                   |                   |                  |                       |                       |
|                           | AIN3                                   |           |      |     |       |      | 13/24<br>(54.2) |                   |                   |                  |                       |                       |
| van der Zee RP;<br>2021_c | Normal                                 |           |      |     |       |      | 5/106 (4.7)     |                   |                   |                  |                       |                       |
|                           | AIN1                                   |           |      |     |       |      | 1/37 (2.7)      |                   |                   |                  |                       |                       |
|                           | AIN2                                   |           |      |     |       |      | 19/98<br>(19.4) |                   |                   |                  |                       |                       |

|                           |        |               |               |               |               |               |                  |  |  |  |  |  |
|---------------------------|--------|---------------|---------------|---------------|---------------|---------------|------------------|--|--|--|--|--|
|                           | AIN3   |               |               |               |               |               | 30/30<br>(100.0) |  |  |  |  |  |
| van der Zee RP;<br>2021_a | Normal | 3/30<br>(10)  | 2/30 (7)      | 9/30 (30)     | 3/30<br>(10)  | 5/30 (17)     | 2/30 (7)         |  |  |  |  |  |
|                           | AIN1   | 10/57<br>(18) | 7/57 (13)     | 6/57 (11)     | 5/57 (9)      | 4/57 (7)      | 5/57 (9)         |  |  |  |  |  |
|                           | AIN2   | 10/57<br>(18) | 7/57 (13)     | 6/57 (1)      | 5/57 (9)      | 4/57 (7)      | 5/57 (9)         |  |  |  |  |  |
|                           | AIN3   | 18/28<br>(64) | 18/28<br>(64) | 22/28<br>(79) | 18/28<br>(64) | 19/28<br>(68) | 18/28 (64)       |  |  |  |  |  |
|                           | SCC    | 37/40<br>(93) | 33/40<br>(83) | 39/40<br>(98) | 38/40<br>(95) | 37/40<br>(93) | 37/40 (93)       |  |  |  |  |  |
| van der Zee RP;<br>2021_b | Normal |               |               |               |               |               | 0/8 (0.0)        |  |  |  |  |  |
|                           | AIN1   |               |               |               |               |               | 3/23 (11.5)      |  |  |  |  |  |
|                           | AIN2   |               |               |               |               |               | 17/45<br>(37.8)  |  |  |  |  |  |
|                           | AIN3   |               |               |               |               |               | 11/15<br>(73.3)  |  |  |  |  |  |
|                           | SCC    |               |               |               |               |               | 10/10 (100)      |  |  |  |  |  |

\*FAM/miR124-2  
combined

\*\*ZNF582, ASCL1,  
SST combined

Figure S2\_Supplementary: Estimated ROC curves with upper and lower limits of the 95% confidence intervals of methylation test in AIN2 diagnosis.

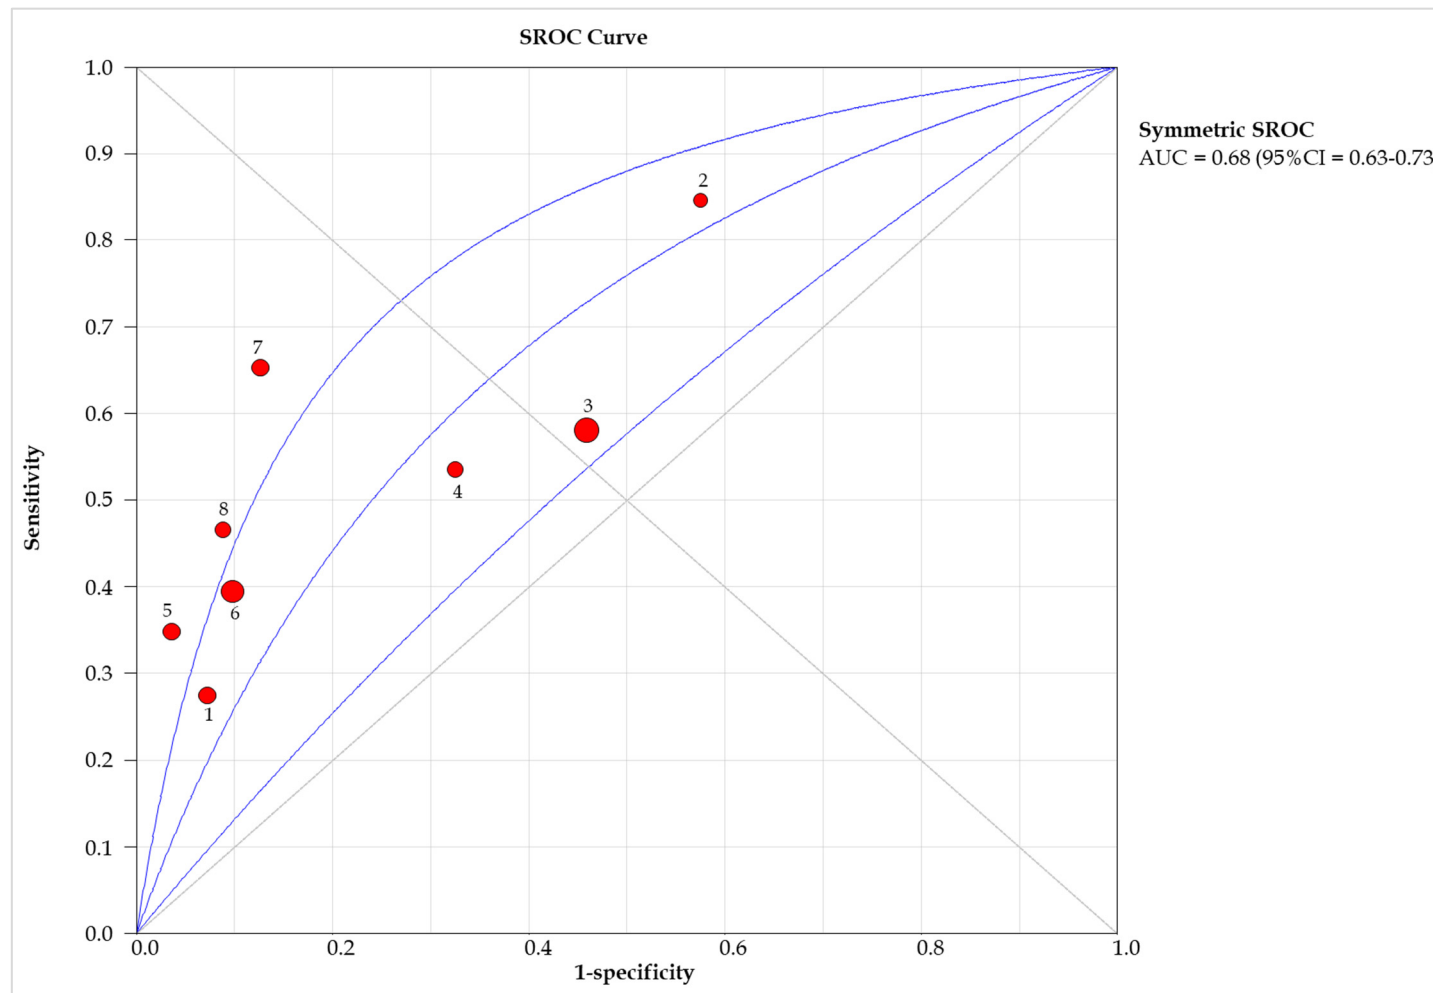

Figure 2: (1) Chaiwongkot A; 2021. (2) Lahiri CD; 2020. (3) Phillips S; 2022. (4) Rozemeijer K; 2023. (5) van der Zee RP; 2019\_a. (6) van der Zee RP; 2021\_c. (7) van der Zee RP; 2021\_a. (8) van der Zee RP; 2021\_b.

Figure S3: Funnel Plot for pooled proportion in AIN1 + LSIL

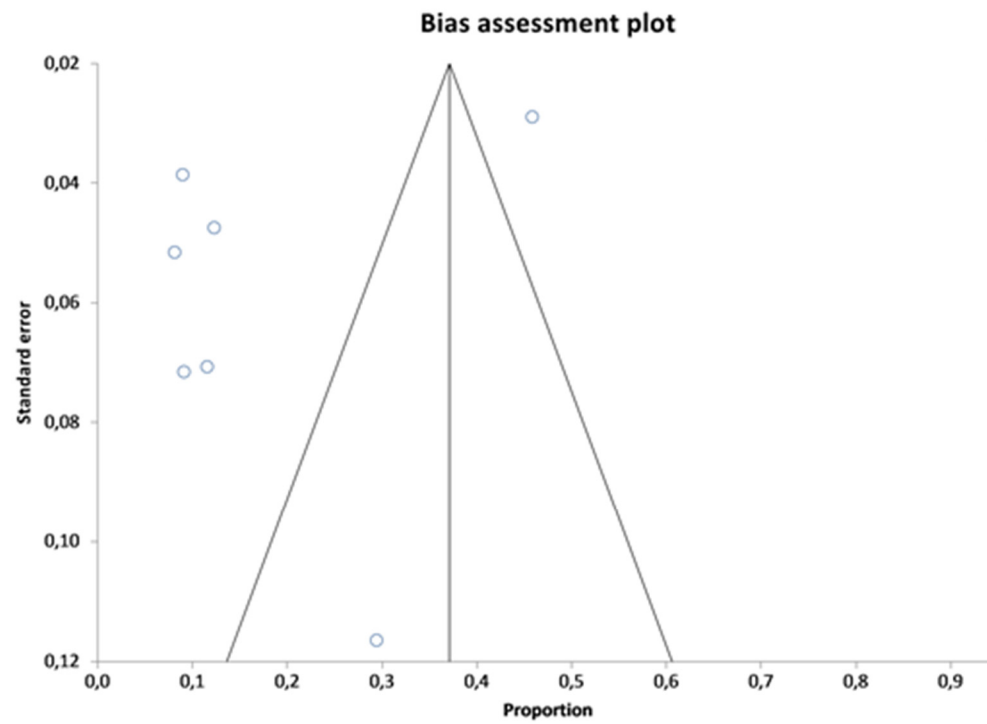

Bias indicators:

Egger: bias = -9,9 (95% CI = -27,9 to 8,1),  $P = 0,23$

Figure S4: Funnel Plot for pooled proportion in AIN2 + HSIL

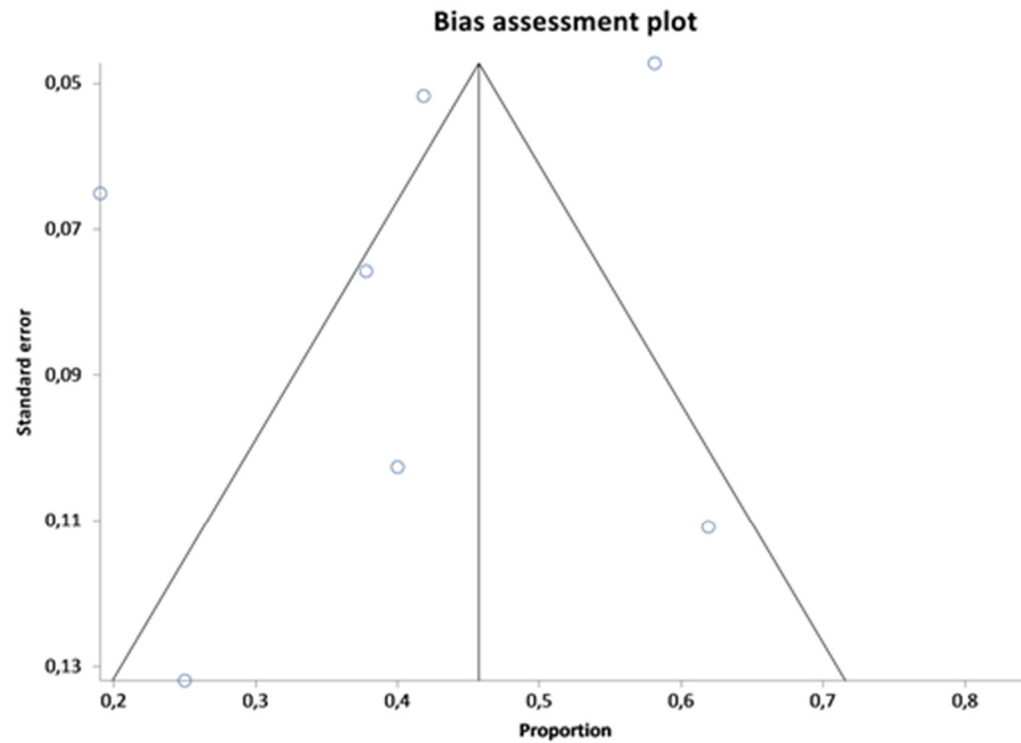

Bias indicators

Egger: bias = 0.1 (95% CI = -6.5 to 6.8) P = 1.0



Figure S5: Funnel Plot for pooled proportion in AIN3

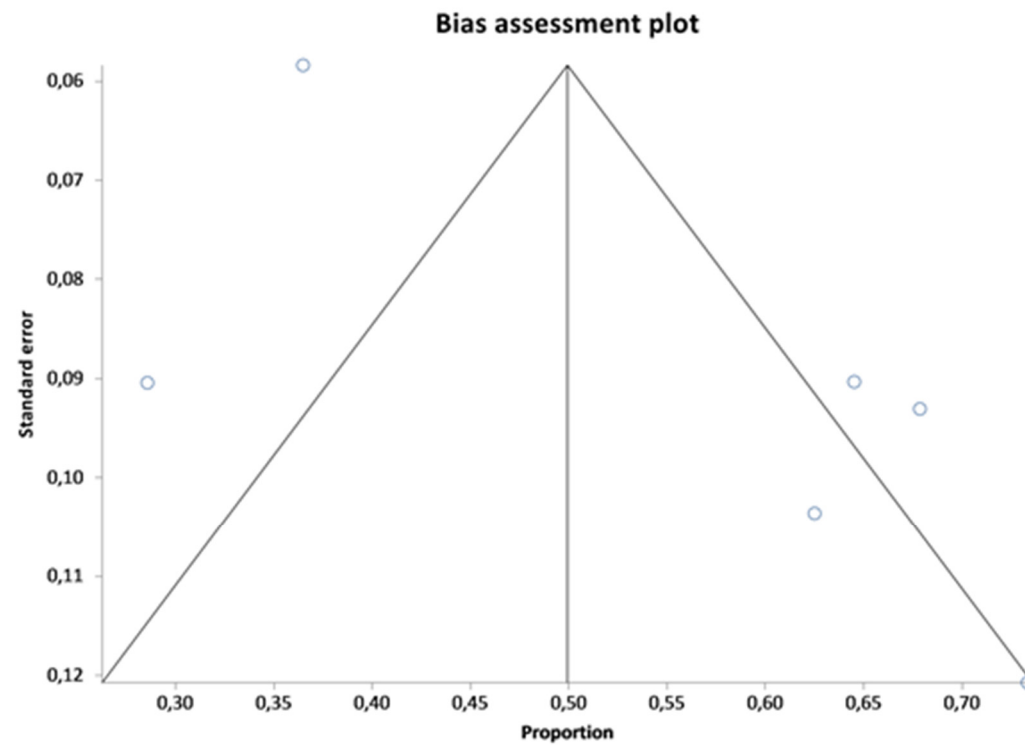

Bias indicators

Egger: bias = 5.8 (95% CI = -2.2-13.7) P = 0.1

Figure S6: Funnel Plot for pooled proportion in SCC

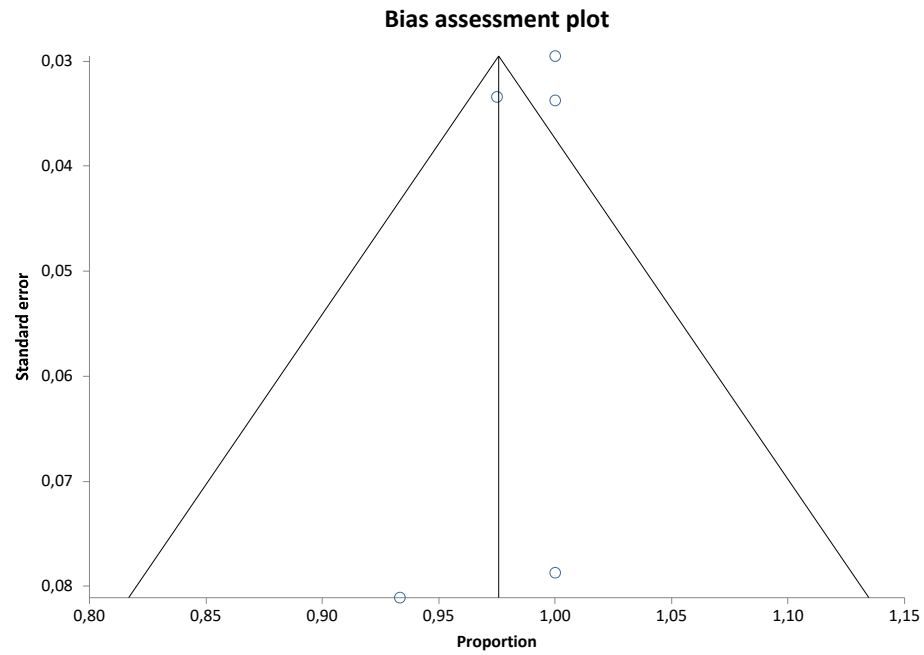

Bias indicators

Egger: bias = -0.6 (95% CI = -2.5-1.3), P = 0.4
